# Supplementary material for: Synthesis, Structure, and Antiproliferative Action of 2-Pyridyl Urea-Based Cu(II) Complexes
Source: MDPI journal article supplement (doi:10.3390/biomedicines10020461), 2022-02-16
Supplement: s1 [file s1]

## **Supporting Information**

**for**

### **Synthesis, Structure and Antiproliferative Action of 2-Pyridyl Urea-Based Cu(II) Complexes**

**Kirill K. Geyl<sup>1</sup>, Sergey V. Baykov<sup>1,\*</sup>, Stanislav A. Kalinin<sup>1,2</sup>, Alexander S. Bunev<sup>2</sup>, Marina A. Troshina<sup>2</sup>, Tatiana V. Sharonova<sup>1</sup>, Mikhail Yu. Skripkin<sup>1</sup>, Svetlana O. Kasatkina<sup>1</sup>, Sofia I. Presnukhina<sup>3</sup>, Anton A. Shetnev<sup>3</sup>, Mikhail Yu. Krasavin<sup>1</sup>, Vadim P. Boyarskiy<sup>1</sup>**

Address:

<sup>1</sup>Institute of Chemistry, Saint Petersburg State University, Universitetsky pr. 26, Saint Petersburg, 198504, Russian Federation.

<sup>2</sup>Medicinal Chemistry Center, Togliatti State University, Togliatti, 445020, Russian Federation

<sup>3</sup>Pharmaceutical Technology Transfer Center, Yaroslavl State Pedagogical University named after K.D. Ushinskiy, 108 Respublikanskaya St., Yaroslavl, 150000, Russian Federation.

\* Corresponding author: s.baykov@spbu.ru

## **Content**

|                                                          |    |
|----------------------------------------------------------|----|
| 1. Synthesis and characterization of Urea1–12.....       | 3  |
| 2. Crystallographic information.....                     | 8  |
| 3. TG/DTG data of the synthesized Cu(II) complexes ..... | 16 |
| 4. References.....                                       | 22 |

## 1. Synthesis and characterization of Urea1–12

**U1–12** were synthesized from corresponding *N*-oxides according to literature procedures [1,2]. **U1–4** and **U7–8** were described in work [1], **U5** was described in work [2], **U6** was described in work [3], and **U9–12** were described in work [4].

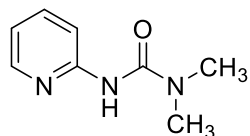

**1,1-Dimethyl-3-(pyridin-2-yl)urea (U1)** [1]. Yield 84 mg (51%); pale yellow solid; mp 40–42 °C.  $^1\text{H}$  NMR (400 MHz,  $\text{CDCl}_3$ ):  $\delta$  8.20 (d,  $J = 3.6$  Hz, 1H), 8.08 (d,  $J = 8.4$  Hz, 1H), 7.71–7.62 (m, 1H), 6.99–6.90 (m, 1H), 3.07 (s, 6H).  $^{13}\text{C}$  NMR (101 MHz,  $\text{CDCl}_3$ ):  $\delta$  154.80, 152.77, 147.27, 137.98, 118.14, 113.04, 36.30.

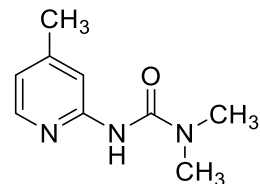

**1,1-Dimethyl-3-(4-methylpyridin-2-yl)urea (U2)** [1]. Yield 110 mg (61%); pale yellow solid; mp 103–104 °C.  $^1\text{H}$  NMR (400 MHz,  $\text{CDCl}_3$ ):  $\delta$  8.06 (d,  $J = 5.2$  Hz, 1H), 7.93 (s, 1H), 7.11 (s, 1H), 6.79 (d,  $J = 5.2$  Hz, 1H), 3.07 (s, 6H), 2.35 (s, 3H).  $^{13}\text{C}$  NMR (101 MHz,  $\text{CDCl}_3$ ):  $\delta$  154.94, 152.82, 149.47, 147.03, 119.57, 113.51, 36.38, 21.37.

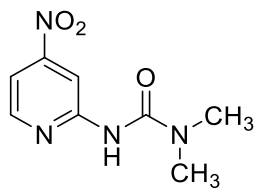

**1,1-Dimethyl-3-(4-nitropyridin-2-yl)urea (U3)** [1]. Yield 114 mg (54%); white solid; mp 124–125 °C.  $^1\text{H}$  NMR (400 MHz,  $\text{CDCl}_3$ ):  $\delta$  8.83 (d,  $J$  = 1.6 Hz, 1H), 8.42 (d,  $J$  = 5.2 Hz, 1H), 7.62 (dd,  $J$  = 5.2, 2.0 Hz, 1H), 7.51 (s, 1H), 3.09 (s, 6H).  $^{13}\text{C}$  NMR (101 MHz,  $\text{CDCl}_3$ ):  $\delta$  155.30, 154.97, 154.11, 149.36, 110.68, 106.23, 36.36.

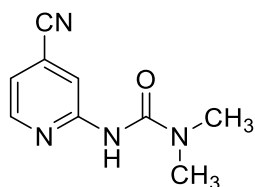

**3-(4-Cyanopyridin-2-yl)-1,1-dimethylurea (U4)** [1]. Yield 97 mg (51%); white solid; mp 98–99 °C.  $^1\text{H}$  NMR (400 MHz,  $\text{CDCl}_3$ ):  $\delta$  8.41 (s, 1H), 8.34 (d,  $J$  = 5.2 Hz, 1H), 7.34 (s, 1H), 7.14 (d,  $J$  = 4.0 Hz, 1H), 3.08 (s, 6H).  $^{13}\text{C}$  NMR (101 MHz,  $\text{CDCl}_3$ ):  $\delta$  154.14, 153.53, 148.59, 121.99, 119.39, 116.70, 115.18, 36.39.

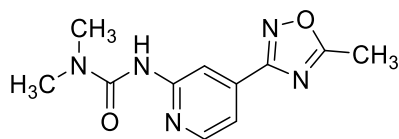

**1,1-Dimethyl-3-(4-(5-methyl-1,2,4-oxadiazol-3-yl)pyridin-2-yl)urea (U5)** [2]. Yield 188 mg (76%); yellow solid; mp 140–142 °C.  $^1\text{H}$  NMR (400 MHz,  $\text{CDCl}_3$ ):  $\delta$  8.77 (s, 1H), 8.31 (d,  $J$  = 5.2 Hz, 1H), 7.57 (dd,  $J$  = 5.2, 1.3 Hz, 1H), 7.54–7.43 (s, 1H), 3.08 (s, 6H), 2.66 (s, 3H).  $^{13}\text{C}$  NMR (101 MHz,  $\text{CDCl}_3$ ):  $\delta$  177.1, 167.1, 154.5, 153.7, 147.7, 136.6, 115.8, 111.4, 36.5, 12.3.

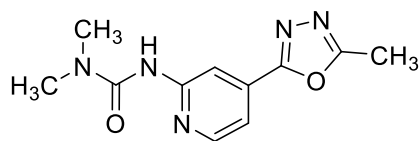

**1,1-Dimethyl-3-(4-(5-methyl-1,3,4-oxadiazol-2-yl)pyridin-2-yl)urea (U6)** [3]. Yield 161 mg (65%); yellow solid; mp 193–195 °C.  $^1\text{H}$  NMR (400 MHz, DMSO- $d_6$ ):  $\delta$  9.21 (s, 1H), 8.44 (dd,  $J$  = 5.2, 0.8 Hz, 1H), 8.42–7.40 (s, 1H), 7.49 (dd,  $J$  = 5.2, 1.5 Hz, 1H), 2.98 (s, 6H), 2.62 (s, 3H).  $^{13}\text{C}$  NMR (101 MHz, DMSO- $d_6$ ):  $\delta$  165.3, 163.3, 155.5, 155.3, 149.4, 132.3, 114.2, 109.7, 36.7, 11.1.

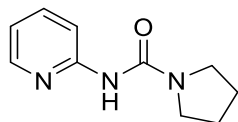

**N-(Pyridin-2-yl)pyrrolidine-1-carboxamide (U7)** [1]. Yield 84 mg (44%); pale yellow solid; mp 116–117 °C.  $^1\text{H}$  NMR (400 MHz,  $\text{CDCl}_3$ ):  $\delta$  8.20–8.16 (m, 1H), 8.11 (dt,  $J$  = 8.4, 1.2 Hz, 1H), 7.67–7.63 (m, 1H), 7.00 (s, 1H), 6.92 (ddd,  $J$  = 7.2, 5.2, 1.2 Hz, 1H), 3.52–3.46 (m, 4H), 1.98–1.94 (m, 4H).  $^{13}\text{C}$  NMR (101 MHz,  $\text{CDCl}_3$ ):  $\delta$  153.01, 152.68, 147.30, 137.92, 118.02, 112.85, 45.69, 25.43.

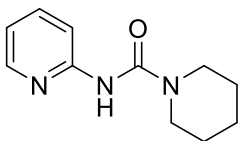

**N-(Pyridin-2-yl)piperidine-1-carboxamide (U8)** [1]. Yield 97 mg (47%); white solid; mp 87–88 °C.  $^1\text{H}$  NMR (400 MHz,  $\text{CDCl}_3$ ):  $\delta$  8.24–8.16 (m, 1H), 8.02 (d,  $J$  = 8.4 Hz, 1H), 7.64 (s, 1H),

7.28 (s, 1H), 6.93 (d,  $J = 2.4$  Hz, 1H), 3.56–3.41 (m, 4H), 1.71–1.57 (m, 6H).  $^{13}\text{C}$  NMR (101 MHz,  $\text{CDCl}_3$ ):  $\delta$  153.92, 153.02, 147.44, 138.01, 118.14, 113.26, 45.20, 25.71, 24.37.

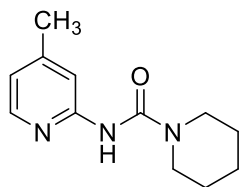

***N*-(Pyridin-2-yl)piperidine-1-carboxamide (U9)** [3]. Yield 92 mg (42%); white solid; mp 108–109 °C.  $^1\text{H}$  NMR (400 MHz,  $\text{CDCl}_3$ ):  $\delta$  8.06 (d,  $J = 5.2$  Hz, 1H), 7.90 (s, 1H), 7.15 (s, 1H), 6.78 (d,  $J = 5.2$  Hz, 1H), 3.50 (t,  $J = 5.2$  Hz, 4H), 2.35 (s, 3H), 1.71–1.62 (m, 6H).  $^{13}\text{C}$  NMR (101 MHz,  $\text{CDCl}_3$ ):  $\delta$  154.0, 153.0, 149.4, 147.1, 119.5, 113.7, 45.2, 25.7, 24.5, 21.4.

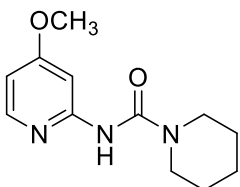

***N*-(4-Methoxypyridin-2-yl)piperidine-1-carboxamide (U10)** [3]. Yield 172 mg (73%); white solid; mp 74–75 °C.  $^1\text{H}$  NMR (400 MHz,  $\text{CDCl}_3$ ):  $\delta$  7.99 (d,  $J = 5.9$  Hz, 1H), 7.72 (d,  $J = 2.4$  Hz, 1H), 7.25 (s, 1H), 6.51 (dd,  $J = 5.9, 2.4$  Hz, 1H), 3.58–3.43 (m, 4H), 1.73–1.55 (m, 6H).  $^{13}\text{C}$  NMR (101 MHz,  $\text{CDCl}_3$ ):  $\delta$  167.56, 154.72, 153.92, 147.37, 106.92, 97.16, 55.32, 45.23, 25.71, 24.36.

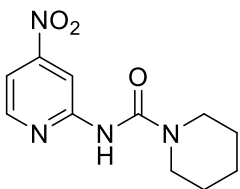

***N*-(4-Nitropyridin-2-yl)piperidine-1-carboxamide (U11)** [3]. Yield 138 mg (55%); orange solid; mp 119–121 °C. <sup>1</sup>H NMR (400 MHz, CDCl<sub>3</sub>): δ 8.83 (d, *J* = 2.0 Hz, 1H), 8.42 (d, *J* = 5.6 Hz, 1H), 7.79–7.50 (m, 2H), 3.57–3.48 (m, 4H), 1.75–1.59 (m, 6H). <sup>13</sup>C NMR (101 MHz, CDCl<sub>3</sub>): δ 155.42, 155.22, 153.07, 149.13, 110.65, 106.65, 45.31, 25.69, 24.24.

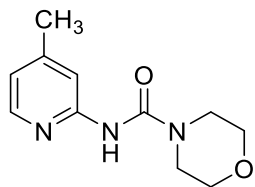

***N*-(4-Methylpyridin-2-yl)morpholine-4-carboxamide (U12)** [3]. Yield 115 mg (52%); white solid; mp 56–58 °C. <sup>1</sup>H NMR (400 MHz, CDCl<sub>3</sub>): δ 8.05 (d, *J* = 4.6 Hz, 1H), 7.88 (s, 1H), 7.32 (s, 1H), 6.80 (d, *J* = 4.5 Hz, 1H), 3.84–3.64 (m, 4H), 3.62–3.42 (m, 4H), 2.36 (s, 3H). <sup>13</sup>C NMR (101 MHz, CDCl<sub>3</sub>): δ 154.3, 152.6, 150.1, 146.4, 119.8, 114.1, 66.5, 44.3, 21.5.

## 2. Crystallographic information

**Table S1.** Crystal data and structure refinement for  $[\text{Cu}(\text{U1})_2\text{Cl}]^+[\text{Cl}]^-$ ,  $[\text{Cu}(\text{U2})_2\text{Cl}]^+[\text{Cl}]^-$  and  $[\text{Cu}(\text{U3})_2\text{Cl}_2]$ .

| Identification code                                           | $[\text{Cu}(\text{U1})_2\text{Cl}]^+[\text{Cl}]^-$                       | $[\text{Cu}(\text{U2})_2\text{Cl}]^+[\text{Cl}]^-$                     | $[\text{Cu}(\text{U3})_2\text{Cl}_2]$                                 |
|---------------------------------------------------------------|--------------------------------------------------------------------------|------------------------------------------------------------------------|-----------------------------------------------------------------------|
| Datablock                                                     | KKG-373                                                                  | BSC-235                                                                | <b>BSC-136</b>                                                        |
| CCDC number                                                   | 2104013                                                                  | 2104015                                                                | 2104016                                                               |
| Empirical formula                                             | $\text{C}_{16}\text{H}_{22}\text{Cl}_2\text{CuN}_6\text{O}_2$            | $\text{C}_{18}\text{H}_{34}\text{Cl}_2\text{CuN}_6\text{O}_6$          | $\text{C}_{16}\text{H}_{20}\text{Cl}_2\text{CuN}_8\text{O}_6$         |
| Formula weight                                                | 464.83                                                                   | 564.95                                                                 | 554.84                                                                |
| Temperature/K                                                 | 100(2)                                                                   | 100(2)                                                                 | 100(2)                                                                |
| Crystal system                                                | monoclinic                                                               | triclinic                                                              | triclinic                                                             |
| Space group                                                   | I2/a                                                                     | P-1                                                                    | P-1                                                                   |
| a/Å                                                           | 12.7868(6)                                                               | 7.7544(2)                                                              | 7.8546(4)                                                             |
| b/Å                                                           | 12.7469(5)                                                               | 12.2959(4)                                                             | 8.3151(5)                                                             |
| c/Å                                                           | 12.9949(7)                                                               | 14.3799(5)                                                             | 8.8607(5)                                                             |
| $\alpha/^\circ$                                               | 90                                                                       | 107.947(3)                                                             | 80.009(5)                                                             |
| $\beta/^\circ$                                                | 112.191(6)                                                               | 99.809(3)                                                              | 68.652(5)                                                             |
| $\gamma/^\circ$                                               | 90                                                                       | 96.431(3)                                                              | 88.264(4)                                                             |
| Volume/Å <sup>3</sup>                                         | 1961.18(18)                                                              | 1265.36(7)                                                             | 530.49(6)                                                             |
| Z                                                             | 4                                                                        | 2                                                                      | 1                                                                     |
| $\rho_{\text{calc}}/\text{g/cm}^3$                            | 1.574                                                                    | 1.483                                                                  | 1.737                                                                 |
| $\mu/\text{mm}^{-1}$                                          | 4.293                                                                    | 3.549                                                                  | 4.262                                                                 |
| F(000)                                                        | 956.0                                                                    | 590.0                                                                  | 283.0                                                                 |
| Crystal size/mm <sup>3</sup>                                  | $0.13 \times 0.13 \times 0.13$                                           | $0.17 \times 0.14 \times 0.11$                                         | $0.12 \times 0.12 \times 0.1$                                         |
| Radiation                                                     | Cu K $\alpha$ ( $\lambda = 1.54184$ )                                    | Cu K $\alpha$ ( $\lambda = 1.54184$ )                                  | Cu K $\alpha$ ( $\lambda = 1.54184$ )                                 |
| 2 $\theta$ range for data collection/ $^\circ$                | 10.11 to 154.476                                                         | 6.618 to 152.352                                                       | 10.81 to 139.862                                                      |
| Index ranges                                                  | $-13 \leq h \leq 15$ ,<br>$-15 \leq k \leq 15$ ,<br>$-16 \leq l \leq 16$ | $-9 \leq h \leq 9$ ,<br>$-15 \leq k \leq 15$ ,<br>$-17 \leq l \leq 17$ | $-9 \leq h \leq 8$ ,<br>$-10 \leq k \leq 9$ ,<br>$-10 \leq l \leq 10$ |
| Reflections collected                                         | 9230                                                                     | 23046                                                                  | 4848                                                                  |
| Independent reflections                                       | 2026 [ $R_{\text{int}} = 0.0332$ ,<br>$R_{\text{sigma}} = 0.0216$ ]      | 5210 [ $R_{\text{int}} = 0.0494$ ,<br>$R_{\text{sigma}} = 0.0326$ ]    | 2000 [ $R_{\text{int}} = 0.0202$ ,<br>$R_{\text{sigma}} = 0.0165$ ]   |
| Data/restraints/parameters                                    | 2026/0/136                                                               | 5210/0/320                                                             | 2000/0/154                                                            |
| Goodness-of-fit on $F^2$                                      | 1.052                                                                    | 1.038                                                                  | 1.096                                                                 |
| Final R indexes [ $I \geq 2\sigma(I)$ ]                       | $R_1 = 0.0284$ ,<br>$wR_2 = 0.0798$                                      | $R_1 = 0.0310$ ,<br>$wR_2 = 0.0799$                                    | $R_1 = 0.0262$ ,<br>$wR_2 = 0.0713$                                   |
| Final R indexes [all data]                                    | $R_1 = 0.0294$ ,<br>$wR_2 = 0.0807$                                      | $R_1 = 0.0366$ ,<br>$wR_2 = 0.0839$                                    | $R_1 = 0.0265$ ,<br>$wR_2 = 0.0715$                                   |
| Largest diff. peak/hole /<br>$\text{e} \cdot \text{\AA}^{-3}$ | 0.36/−0.48                                                               | 0.39/−0.42                                                             | 0.33/−0.53                                                            |



**Table S2.** Crystal data and structure refinement for [Cu(**U4**)<sub>2</sub>Cl]<sup>+</sup>[Cl]<sup>−</sup>, [Cu(**U7**)<sub>2</sub>Cl]<sup>+</sup>[Cl]<sup>−</sup> and [Cu(**U9**)<sub>2</sub>Cl]<sup>+</sup>[Cl]<sup>−</sup>.

|                                                          |                                                                                                |                                                                                 |                                                                                 |
|----------------------------------------------------------|------------------------------------------------------------------------------------------------|---------------------------------------------------------------------------------|---------------------------------------------------------------------------------|
| Identification code                                      | [Cu( <b>U4</b> ) <sub>2</sub> Cl] <sup>+</sup> [Cl] <sup>−</sup>                               | [Cu( <b>U7</b> ) <sub>2</sub> Cl] <sup>+</sup> [Cl] <sup>−</sup>                | [Cu( <b>U9</b> ) <sub>2</sub> Cl] <sup>+</sup> [Cl] <sup>−</sup>                |
| Datablock                                                | KKG-222                                                                                        | KKG-265                                                                         | KKG-195                                                                         |
| CCDC number                                              | 2104017                                                                                        | 2104021                                                                         | 2104018                                                                         |
| Empirical formula                                        | C <sub>36</sub> H <sub>40</sub> Cl <sub>4</sub> Cu <sub>2</sub> N <sub>16</sub> O <sub>4</sub> | C <sub>20</sub> H <sub>26</sub> Cl <sub>2</sub> CuN <sub>6</sub> O <sub>2</sub> | C <sub>24</sub> H <sub>34</sub> Cl <sub>2</sub> CuN <sub>6</sub> O <sub>2</sub> |
| Formula weight                                           | 1029.72                                                                                        | 516.91                                                                          | 573.01                                                                          |
| Temperature/K                                            | 100(2)                                                                                         | 100(2)                                                                          | 100(2)                                                                          |
| Crystal system                                           | monoclinic                                                                                     | triclinic                                                                       | monoclinic                                                                      |
| Space group                                              | P2/n                                                                                           | P-1                                                                             | P2 <sub>1</sub> /n                                                              |
| a/Å                                                      | 12.48230(10)                                                                                   | 7.9567(2)                                                                       | 10.0692(3)                                                                      |
| b/Å                                                      | 13.25080(10)                                                                                   | 11.9417(2)                                                                      | 24.5458(7)                                                                      |
| c/Å                                                      | 14.8414(2)                                                                                     | 12.4374(2)                                                                      | 10.6384(3)                                                                      |
| α/°                                                      | 90                                                                                             | 73.1237(17)                                                                     | 90                                                                              |
| β/°                                                      | 110.6690(10)                                                                                   | 74.621(2)                                                                       | 92.502(3)                                                                       |
| γ/°                                                      | 90                                                                                             | 88.1870(19)                                                                     | 90                                                                              |
| Volume/Å <sup>3</sup>                                    | 2296.77(4)                                                                                     | 1089.07(4)                                                                      | 2626.85(14)                                                                     |
| Z                                                        | 2                                                                                              | 2                                                                               | 4                                                                               |
| ρ <sub>calc</sub> g/cm <sup>3</sup>                      | 1.489                                                                                          | 1.576                                                                           | 1.449                                                                           |
| μ/mm <sup>−1</sup>                                       | 3.757                                                                                          | 3.932                                                                           | 3.316                                                                           |
| F(000)                                                   | 1052.0                                                                                         | 534.0                                                                           | 1196.0                                                                          |
| Crystal size/mm <sup>3</sup>                             | 0.13 × 0.12 × 0.11                                                                             | 0.16 × 0.14 × 0.13                                                              | 0.2 × 0.11 × 0.1                                                                |
| Radiation                                                | CuKα (λ = 1.54184)                                                                             | Cu Kα (λ = 1.54184)                                                             | Cu Kα (λ = 1.54184)                                                             |
| 2θ range for data collection/°                           | 6.67 to 140.944                                                                                | 7.71 to 140.848                                                                 | 7.202 to 152.238                                                                |
| Index ranges                                             | −15 ≤ h ≤ 10,<br>−16 ≤ k ≤ 16,<br>−18 ≤ l ≤ 17                                                 | −9 ≤ h ≤ 9,<br>−10 ≤ k ≤ 14,<br>−15 ≤ l ≤ 15                                    | −12 ≤ h ≤ 12,<br>−30 ≤ k ≤ 30,<br>−13 ≤ l ≤ 13                                  |
| Reflections collected                                    | 18842                                                                                          | 10940                                                                           | 17243                                                                           |
| Independent reflections                                  | 4350 [R <sub>int</sub> = 0.0357,<br>R <sub>sigma</sub> = 0.0226]                               | 4154 [R <sub>int</sub> = 0.0536,<br>R <sub>sigma</sub> = 0.0519]                | 5407 [R <sub>int</sub> = 0.0368,<br>R <sub>sigma</sub> = 0.0349]                |
| Data/restraints/parameters                               | 4350/0/296                                                                                     | 4154/0/280                                                                      | 5407/0/336                                                                      |
| Goodness-of-fit on F <sup>2</sup>                        | 1.072                                                                                          | 1.062                                                                           | 0.971                                                                           |
| Final R indexes [I ≥ 2σ (I)]                             | R <sub>1</sub> = 0.0304,<br>wR <sub>2</sub> = 0.0853                                           | R <sub>1</sub> = 0.0400,<br>wR <sub>2</sub> = 0.1100                            | R <sub>1</sub> = 0.0312,<br>wR <sub>2</sub> = 0.0785                            |
| Final R indexes [all data]                               | R <sub>1</sub> = 0.0314,<br>wR <sub>2</sub> = 0.0862                                           | R <sub>1</sub> = 0.0432,<br>wR <sub>2</sub> = 0.1125                            | R <sub>1</sub> = 0.0374,<br>wR <sub>2</sub> = 0.0831                            |
| Largest diff. peak/hole / e <sup>−</sup> Å <sup>−3</sup> | 0.49/−0.52                                                                                     | 0.36/−0.60                                                                      | 0.61/−0.46                                                                      |

**Table S3.** Crystal data and structure refinement for [Cu(U1)<sub>2</sub>Cl]<sup>+</sup>[Cl]<sup>−</sup> and [Cu(U2)Cl<sub>2</sub>H<sub>2</sub>O].

| Identification code                                       | [Cu( <b>U12</b> ) <sub>2</sub> Cl] <sup>+</sup> [Cl] <sup>−</sup>               | [Cu( <b>U2</b> )Cl <sub>2</sub> H <sub>2</sub> O]                              |
|-----------------------------------------------------------|---------------------------------------------------------------------------------|--------------------------------------------------------------------------------|
| Datablock                                                 | KKG-297                                                                         | BSC-106                                                                        |
| CCDC number                                               | 2104019                                                                         | 2104091                                                                        |
| Empirical formula                                         | C <sub>22</sub> H <sub>30</sub> Cl <sub>2</sub> CuN <sub>6</sub> O <sub>4</sub> | C <sub>9</sub> H <sub>19</sub> Cl <sub>2</sub> CuN <sub>3</sub> O <sub>4</sub> |
| Formula weight                                            | 576.96                                                                          | 367.71                                                                         |
| Temperature/K                                             | 100(2)                                                                          | 100(2)                                                                         |
| Crystal system                                            | triclinic                                                                       | triclinic                                                                      |
| Space group                                               | P-1                                                                             | P-1                                                                            |
| a/Å                                                       | 8.8800(4)                                                                       | 7.2201(2)                                                                      |
| b/Å                                                       | 11.2254(4)                                                                      | 9.7425(2)                                                                      |
| c/Å                                                       | 12.9758(4)                                                                      | 11.9473(3)                                                                     |
| α/°                                                       | 81.611(3)                                                                       | 66.272(2)                                                                      |
| β/°                                                       | 81.774(3)                                                                       | 83.676(2)                                                                      |
| γ/°                                                       | 87.818(3)                                                                       | 73.567(2)                                                                      |
| Volume/Å <sup>3</sup>                                     | 1266.25(8)                                                                      | 737.92(3)                                                                      |
| Z                                                         | 2                                                                               | 2                                                                              |
| ρ <sub>calc</sub> g/cm <sup>3</sup>                       | 1.513                                                                           | 1.655                                                                          |
| μ/mm <sup>−1</sup>                                        | 3.507                                                                           | 5.558                                                                          |
| F(000)                                                    | 598.0                                                                           | 378.0                                                                          |
| Crystal size/mm <sup>3</sup>                              | 0.15 × 0.13 × 0.11                                                              | 0.16 × 0.15 × 0.12                                                             |
| Radiation                                                 | Cu Kα (λ = 1.54184)                                                             | CuKα (λ = 1.54184)                                                             |
| 2θ range for data collection/°                            | 6.954 to 140.818                                                                | 8.084 to 145.55                                                                |
| Index ranges                                              | −10 ≤ h ≤ 10,<br>−13 ≤ k ≤ 10,<br>−15 ≤ l ≤ 15                                  | −8 ≤ h ≤ 8, −12 ≤ k ≤ 12,<br>−14 ≤ l ≤ 14                                      |
| Reflections collected                                     | 14682                                                                           | 6718                                                                           |
| Independent reflections                                   | 4778 [R <sub>int</sub> = 0.0467,<br>R <sub>sigma</sub> = 0.0430]                | 2751 [R <sub>int</sub> = 0.0215,<br>R <sub>sigma</sub> = 0.0246]               |
| Data/restraints/parameters                                | 4778/0/341                                                                      | 2751/9/199                                                                     |
| Goodness-of-fit on F <sup>2</sup>                         | 1.066                                                                           | 1.090                                                                          |
| Final R indexes [I ≥ 2σ (I)]                              | R <sub>1</sub> = 0.0450,<br>wR <sub>2</sub> = 0.1222                            | R <sub>1</sub> = 0.0250,<br>wR <sub>2</sub> = 0.0648                           |
| Final R indexes [all data]                                | R <sub>1</sub> = 0.0494,<br>wR <sub>2</sub> = 0.1258                            | R <sub>1</sub> = 0.0254,<br>wR <sub>2</sub> = 0.0651                           |
| Largest diff. peak/hole / e <sup>−</sup> ·Å <sup>−3</sup> | 0.83/−0.81                                                                      | 0.30/−0.39                                                                     |

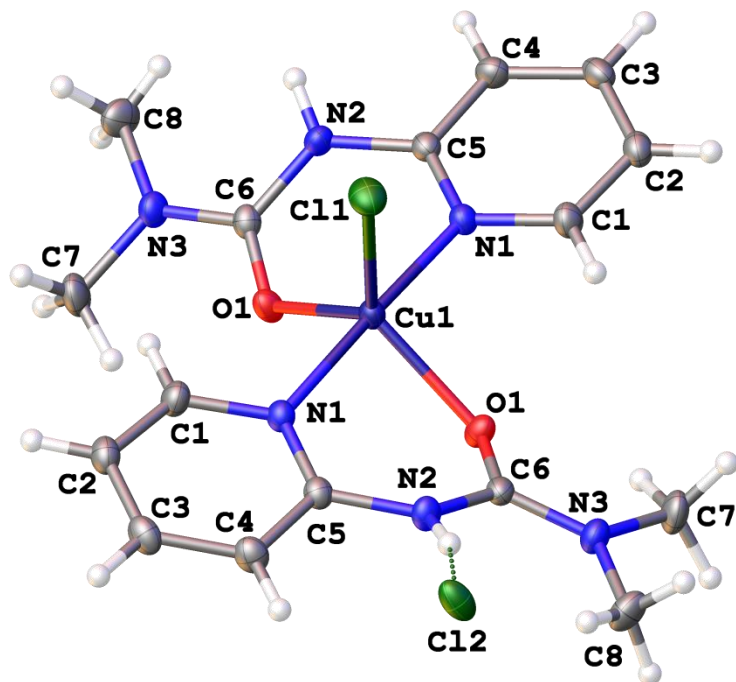

**Figure S1.** Structure of  $[\text{Cu}(\text{U1})_2\text{Cl}]^+[\text{Cl}]^-$ .

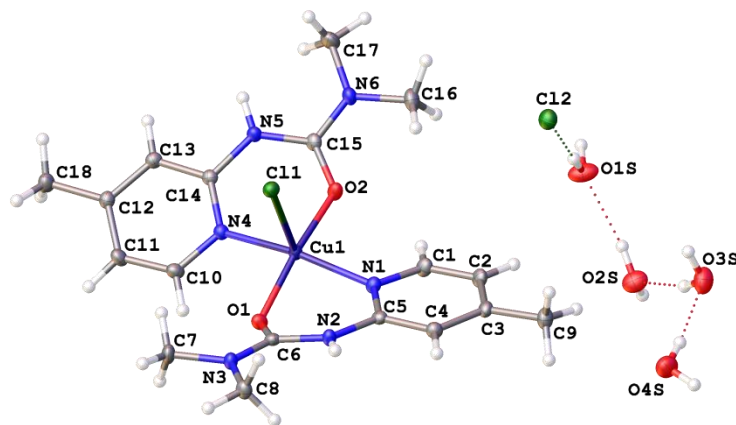

**Figure S2.** Structure of  $[\text{Cu}(\text{U2})_2\text{Cl}]^+[\text{Cl}]^-$ .

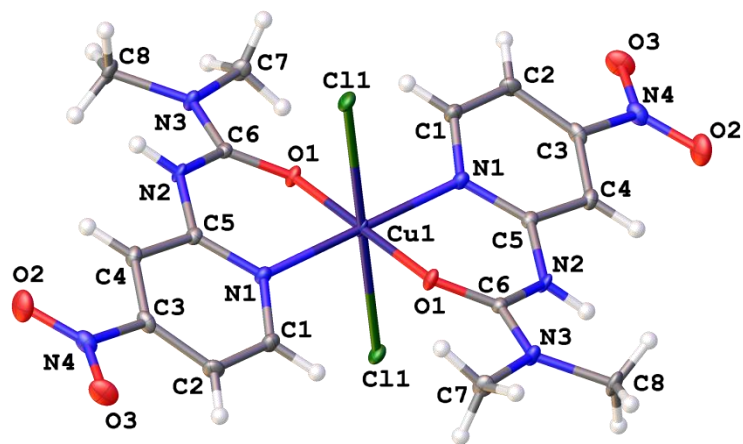

**Figure S3.** Structure of  $[\text{Cu}(\text{U}3)_2\text{Cl}_2]$ .

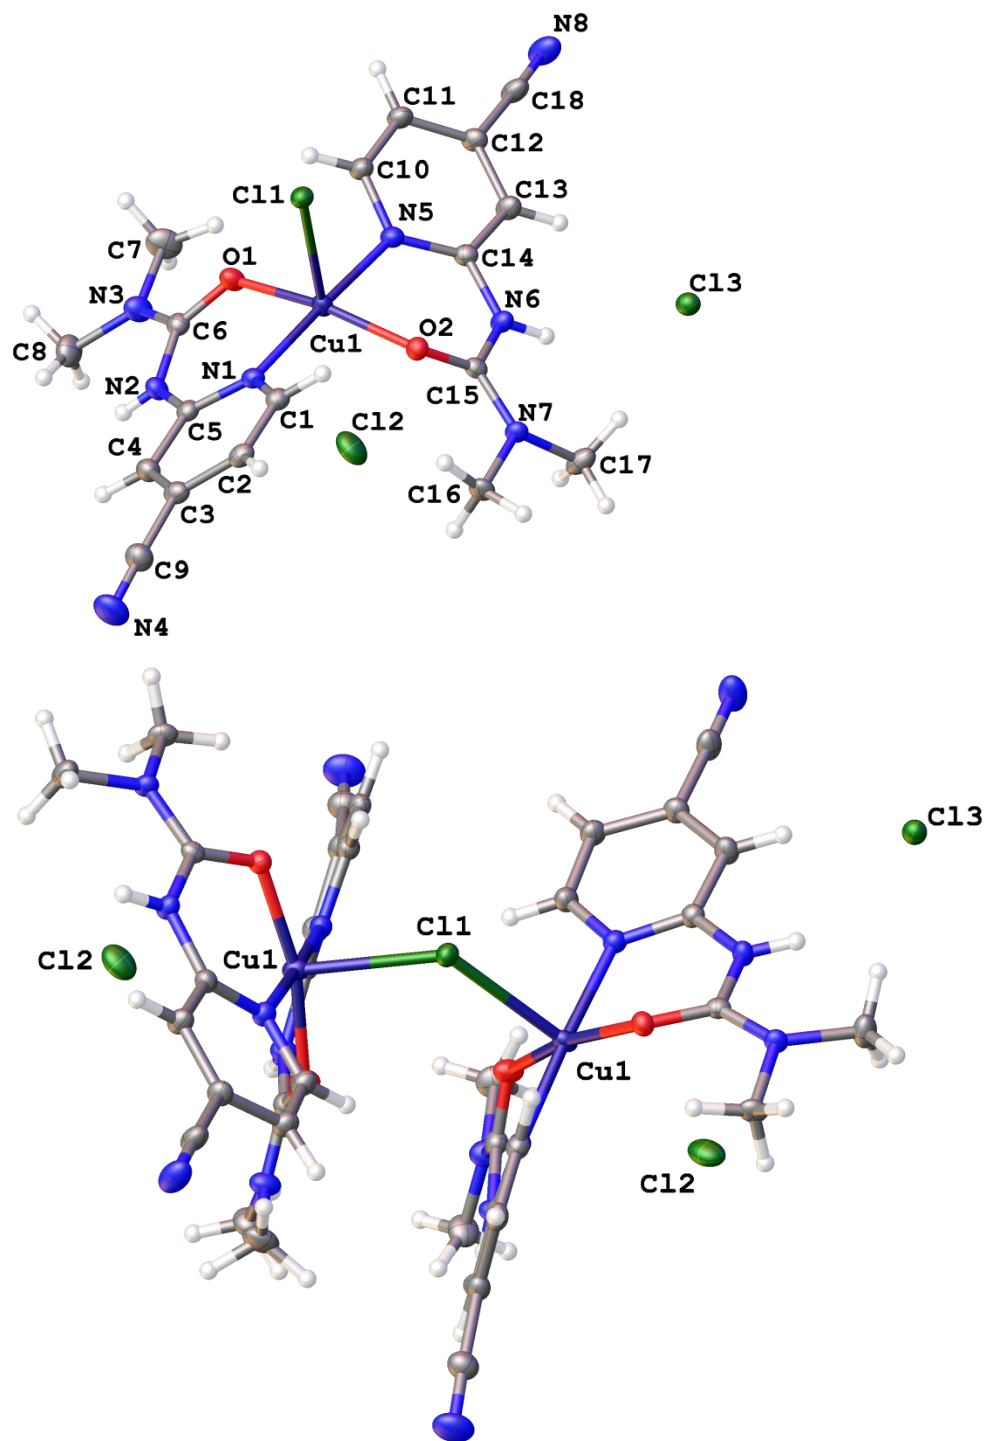

**Figure S4.** Structure of [Cu(U4)<sub>2</sub>Cl]<sup>+</sup>[Cl]<sup>-</sup>.

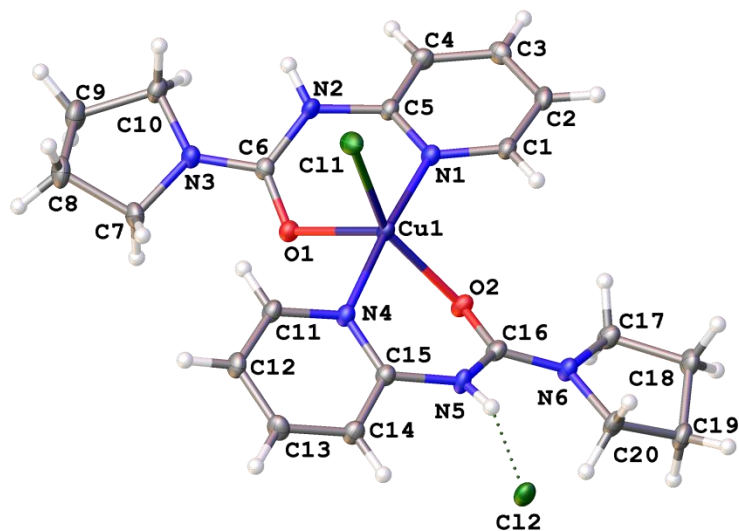

**Figure S5.** Structure of  $[\text{Cu}(\text{U7})_2\text{Cl}]^+[\text{Cl}]^-$ .

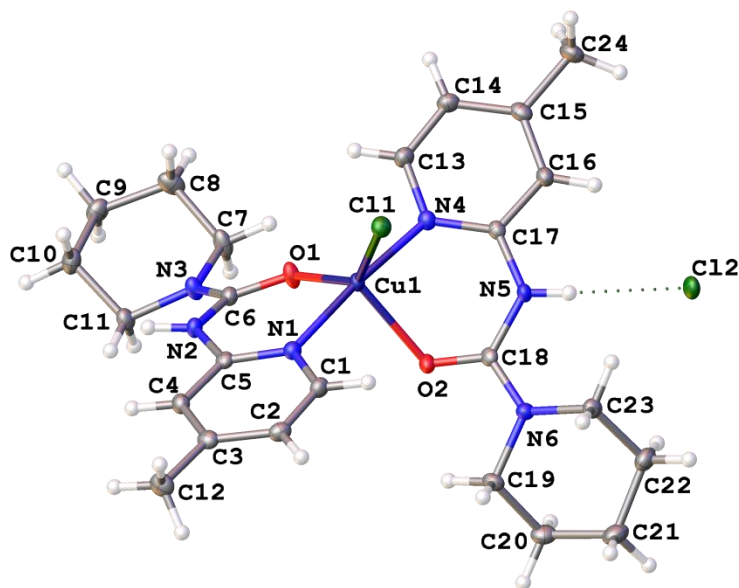

**Figure S6.** Structure of  $[\text{Cu}(\text{U9})_2\text{Cl}]^+[\text{Cl}]^-$ .

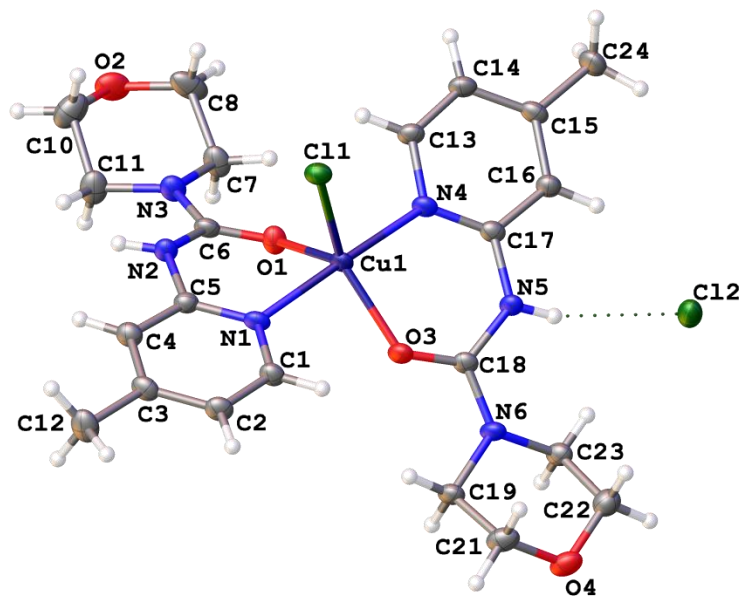

**Figure S7.** Structure of  $[\text{Cu}(\text{U12})_2\text{Cl}]^+[\text{Cl}]^-$ .

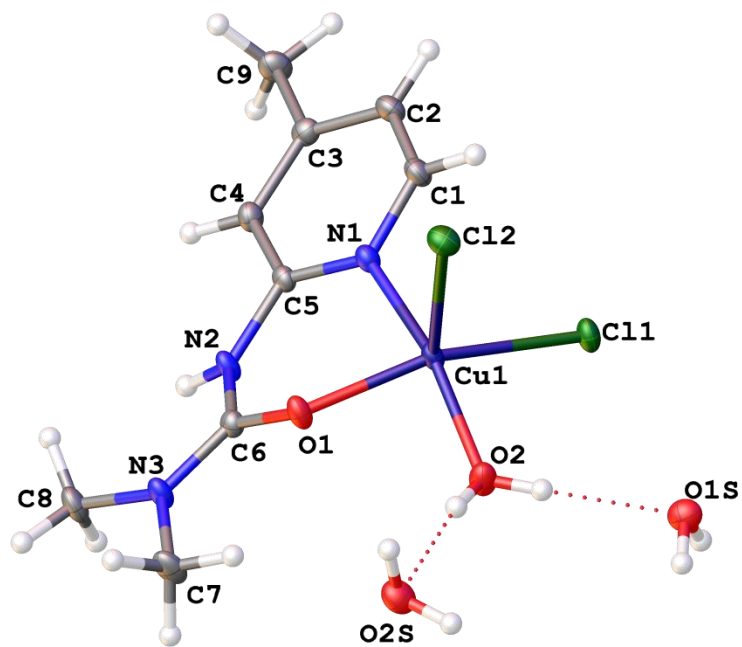

**Figure S8.** Structure of  $[\text{Cu}(\text{U2})\text{Cl}_2\text{H}_2\text{O}]$ .

### 3. TG/DTG data of the synthesized Cu(II) complexes

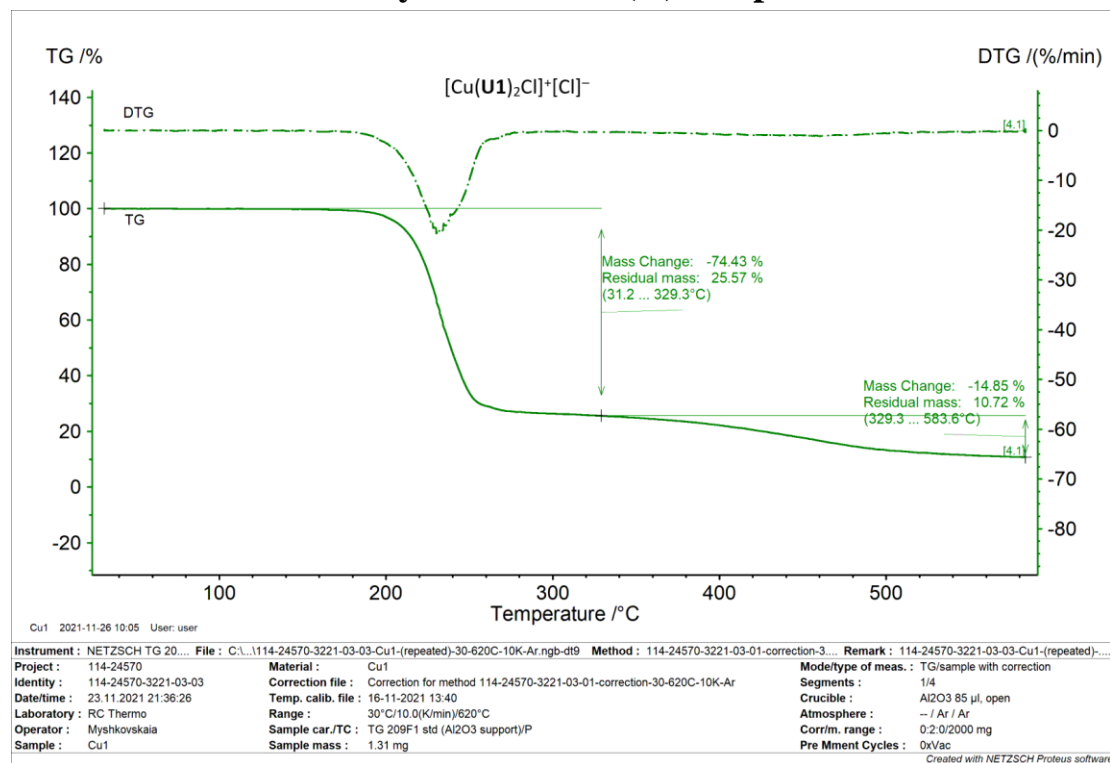

**Figure S9.** TG/DTG curves of [Cu(U1)<sub>2</sub>Cl]<sup>+</sup>[Cl]<sup>-</sup>.

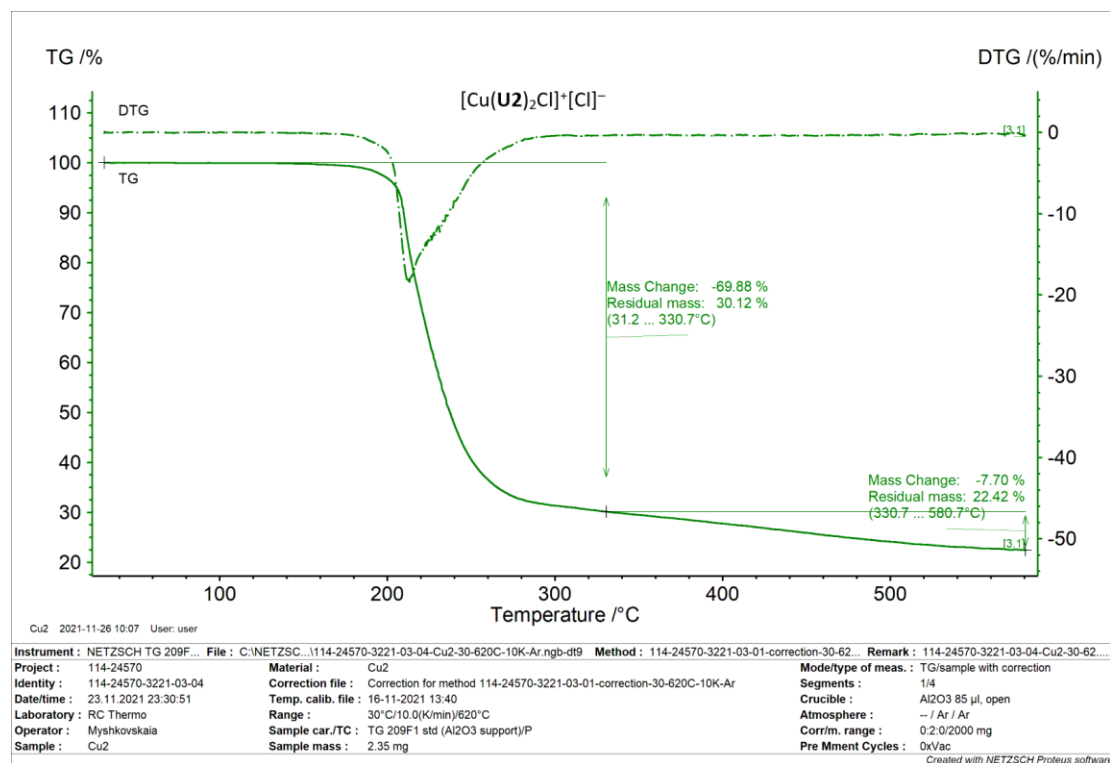

**Figure S10.** TG/DTG curves of [Cu(U2)<sub>2</sub>Cl]<sup>+</sup>[Cl]<sup>-</sup>.



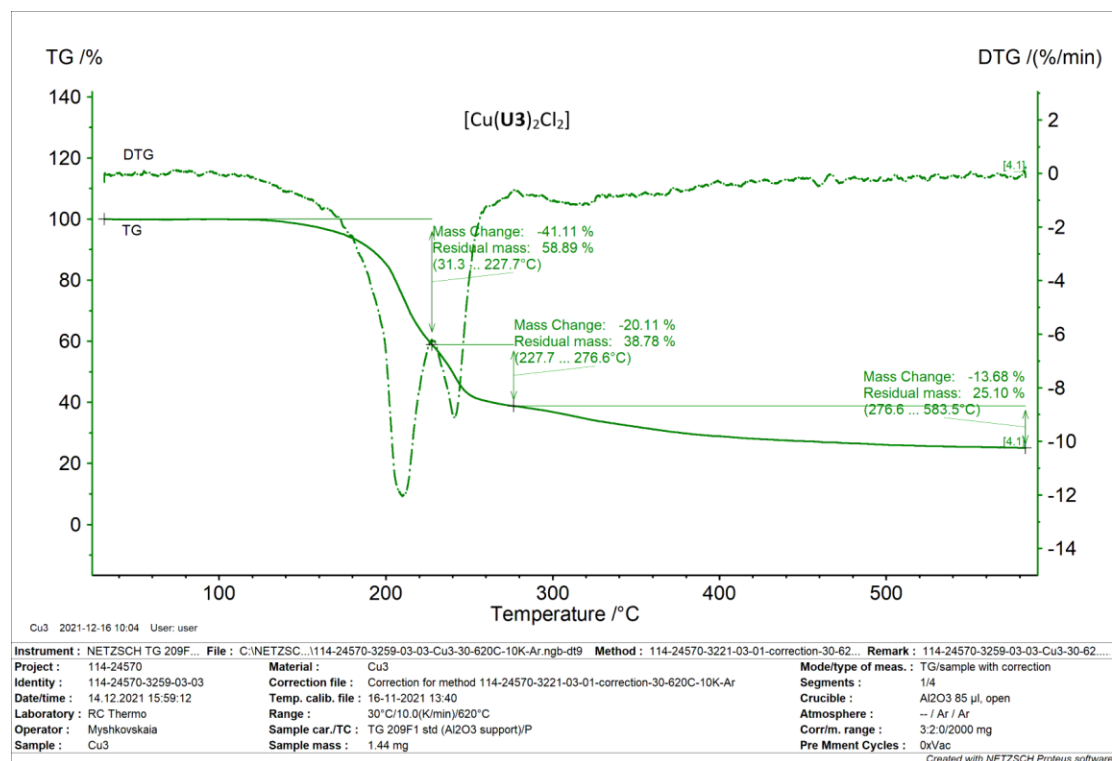

**Figure S11.** TG/DTG curves of [Cu(U3)<sub>2</sub>Cl<sub>2</sub>].

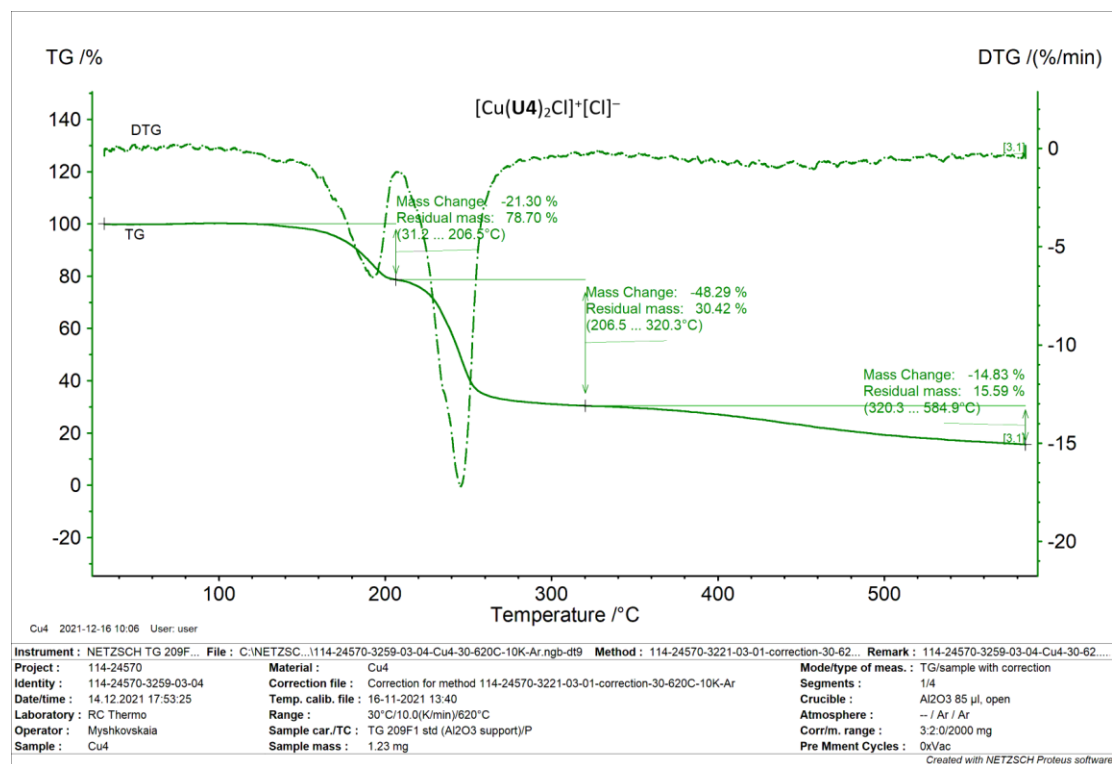

**Figure S12.** TG/DTG curves of [Cu(U4)<sub>2</sub>Cl]<sup>+</sup>[Cl]<sup>-</sup>.

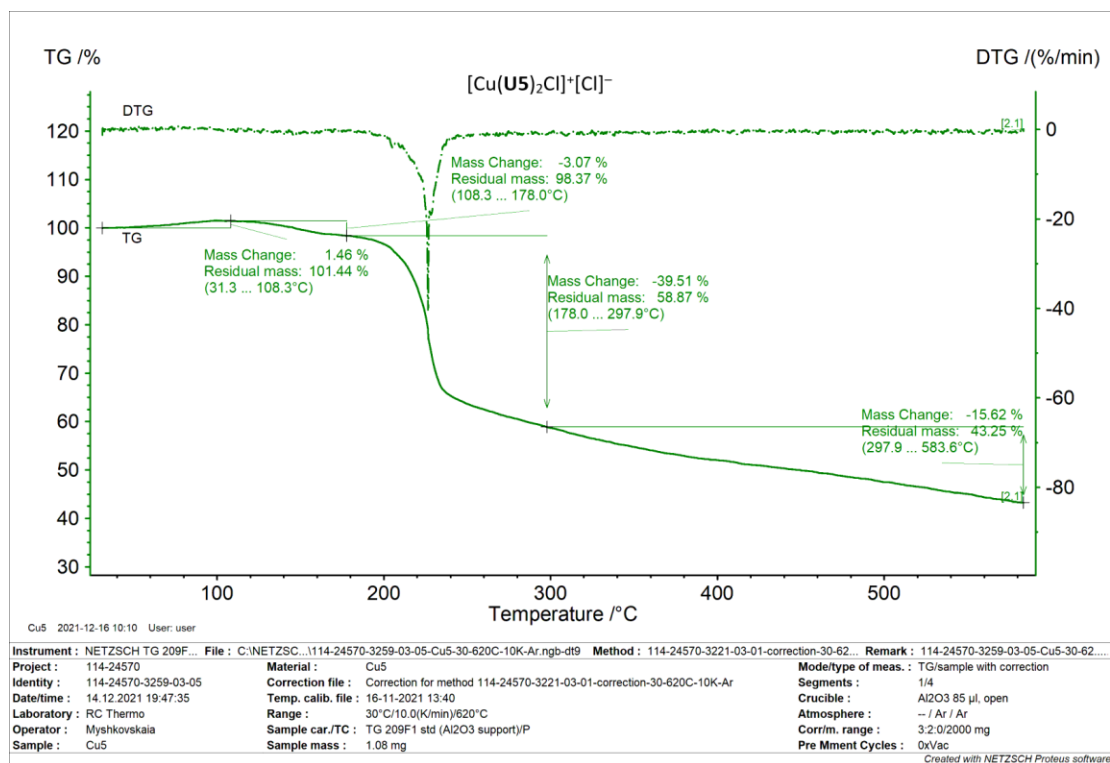

**Figure S13.** TG/DTG curves of  $[\text{Cu}(\text{U}5)_2\text{Cl}]^+[\text{Cl}]^-$ .

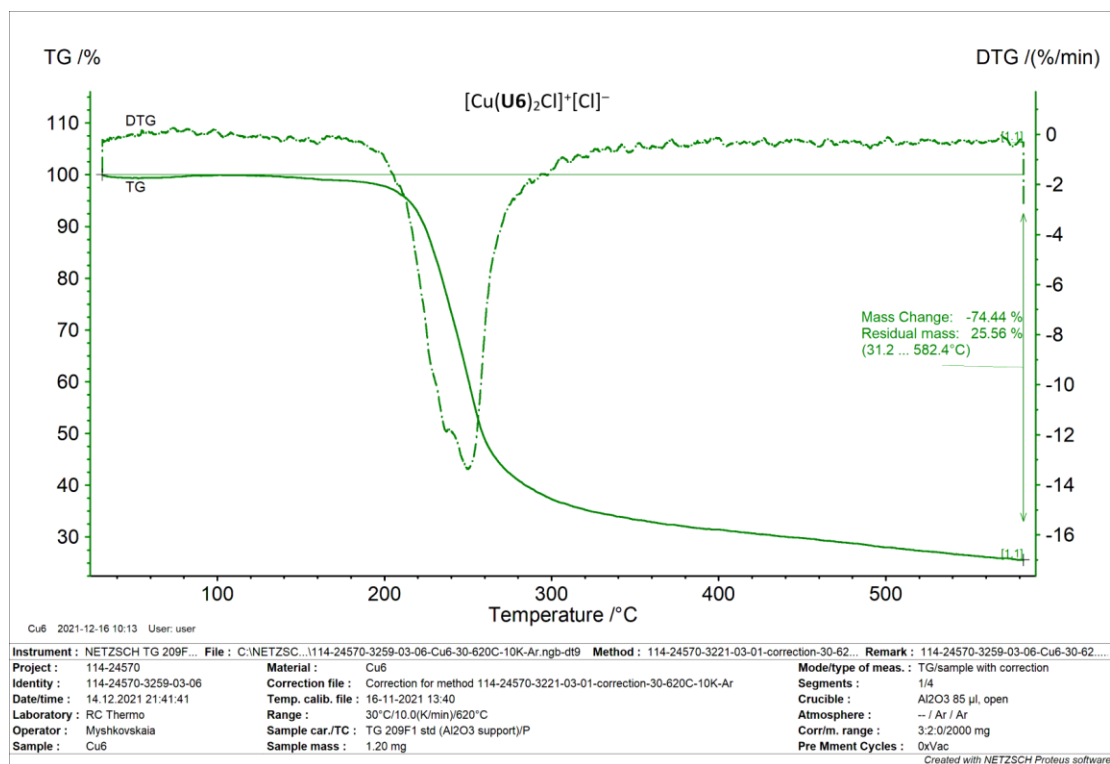

**Figure S14.** TG/DTG curves of  $[\text{Cu}(\text{U}6)_2\text{Cl}]^+[\text{Cl}]^-$ .

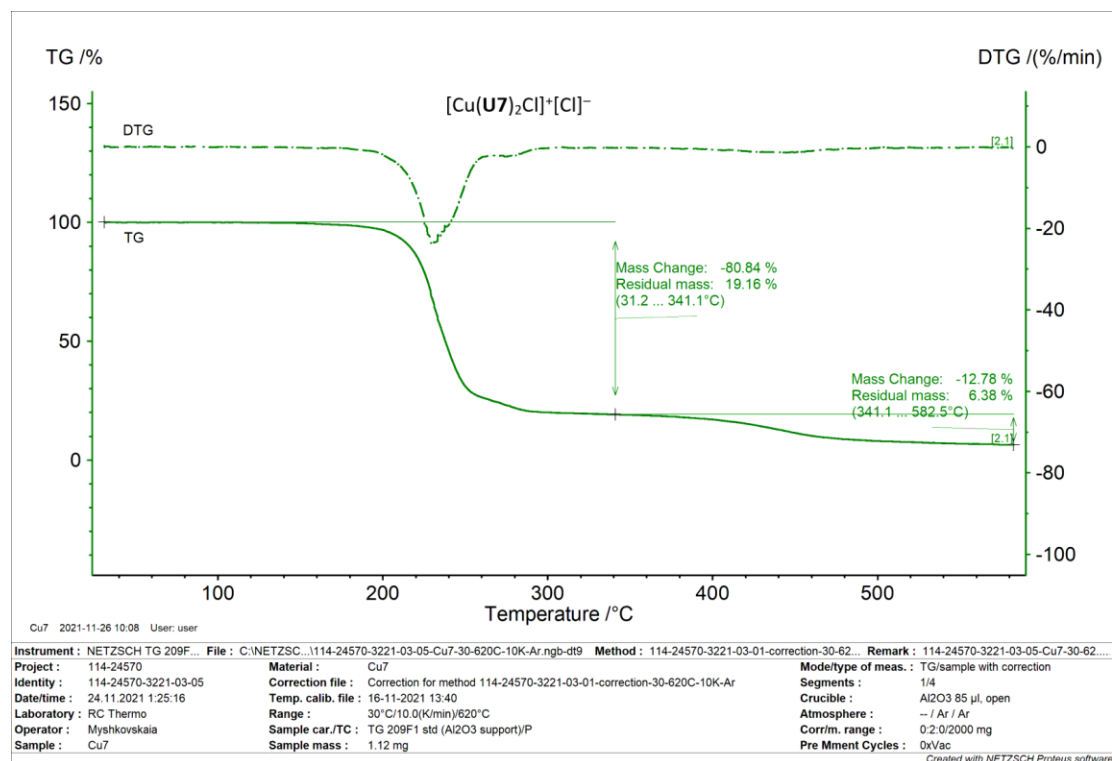

**Figure S15.** TG/DTG curves of  $[\text{Cu}(\text{U}7)_2\text{Cl}]^+[\text{Cl}]^-$ .

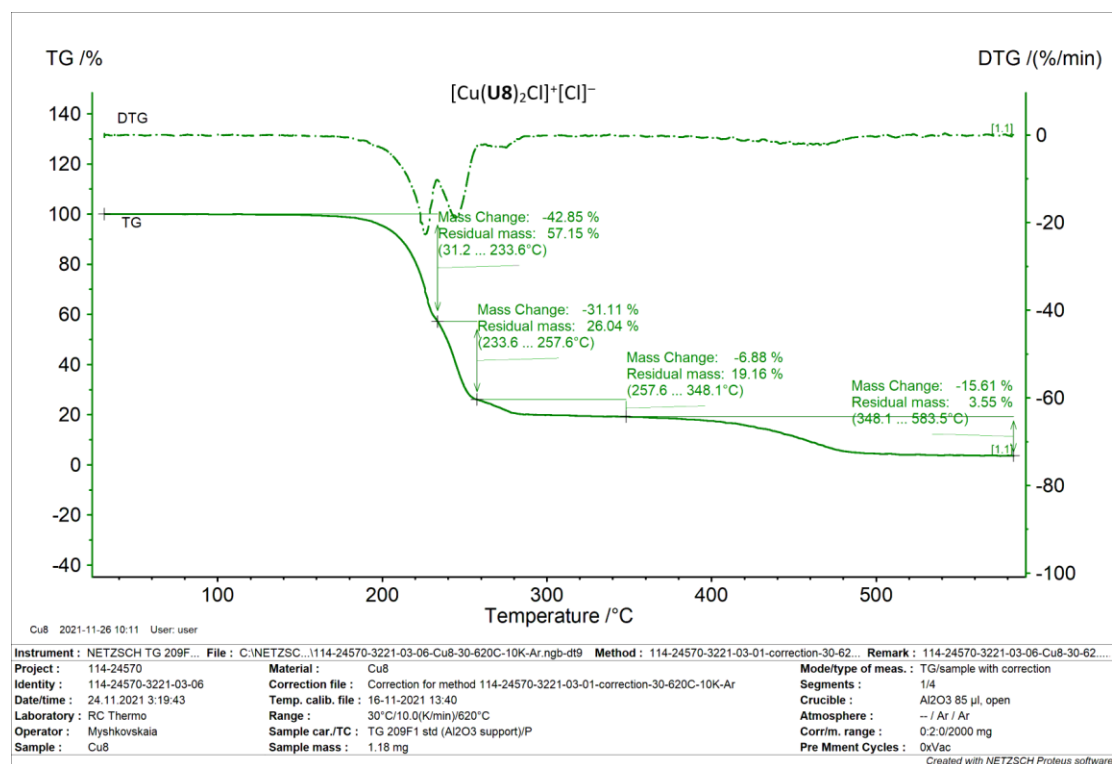

**Figure S16.** TG/DTG curves of  $[\text{Cu}(\text{U}8)_2\text{Cl}]^+[\text{Cl}]^-$ .

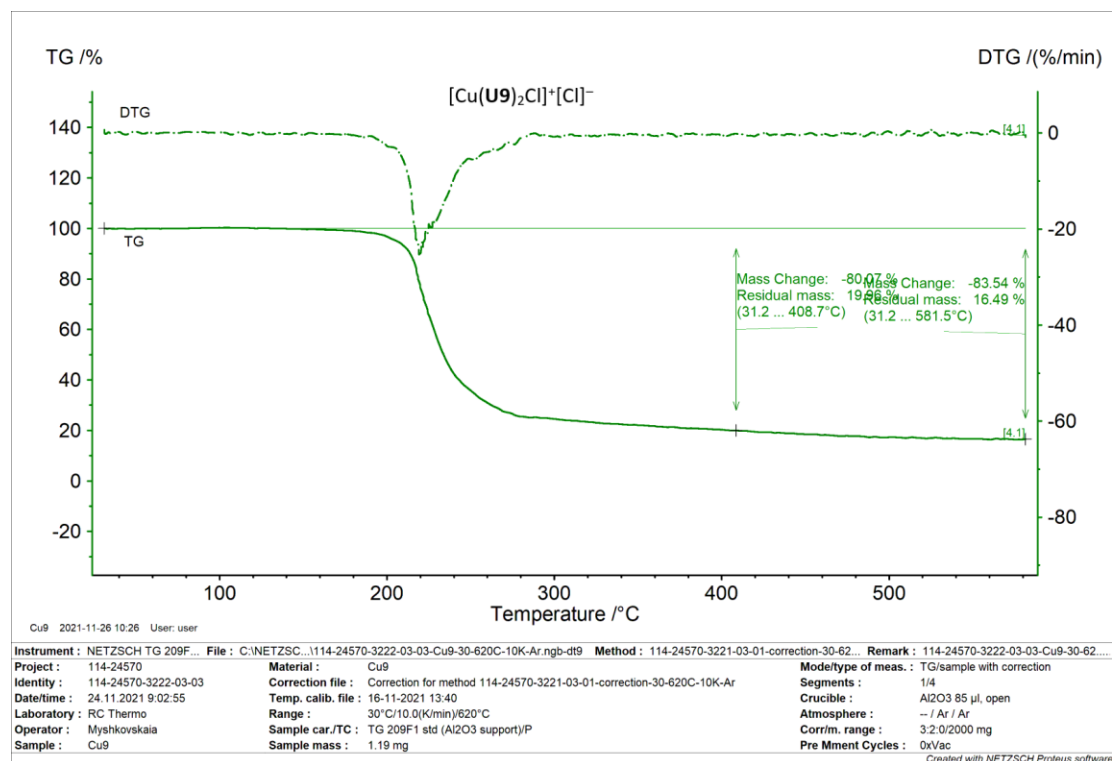

**Figure S17.** TG/DTG curves of [Cu(U9)<sub>2</sub>Cl]<sup>+</sup>[Cl]<sup>-</sup>.

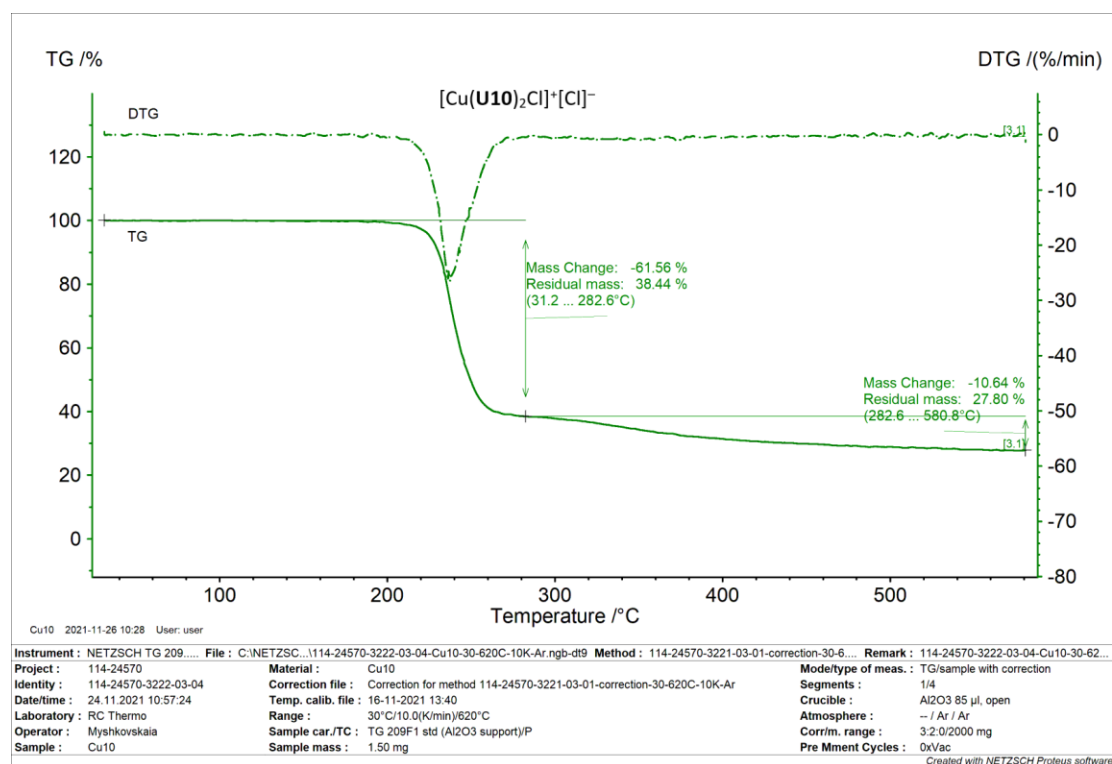

**Figure S18.** TG/DTG curves of [Cu(U10)<sub>2</sub>Cl]<sup>+</sup>[Cl]<sup>-</sup>.

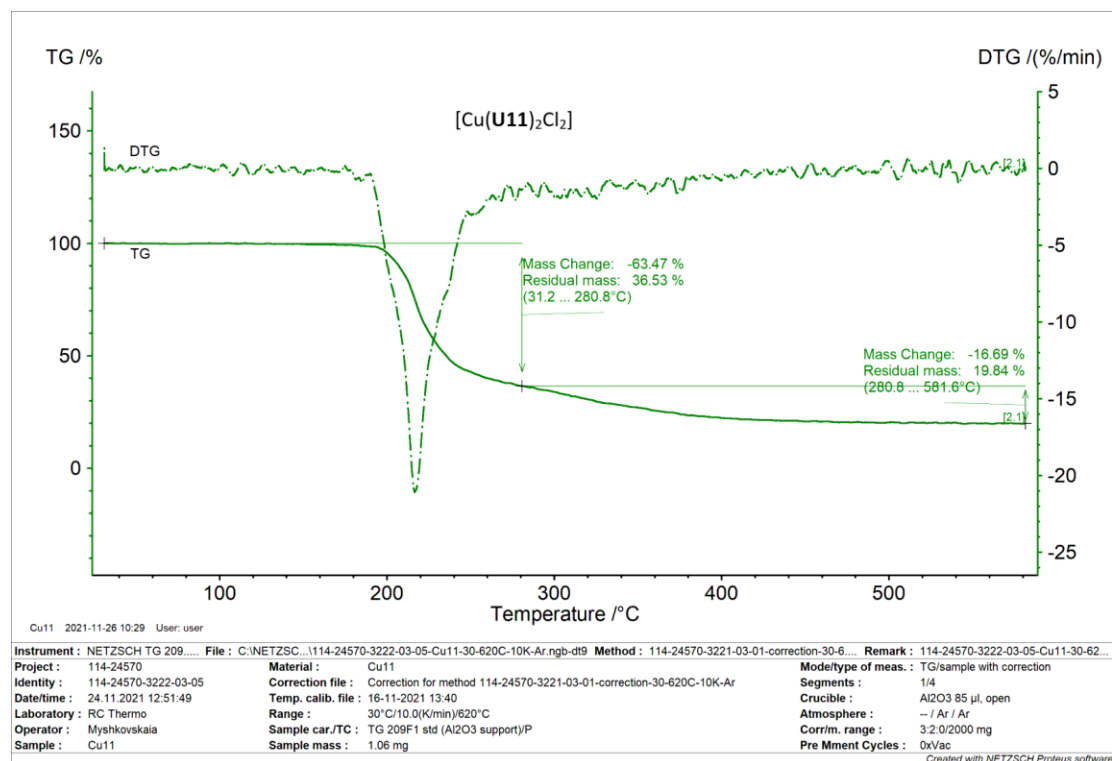

**Figure S19.** TG/DTG curves of [Cu(U11)<sub>2</sub>Cl<sub>2</sub>],

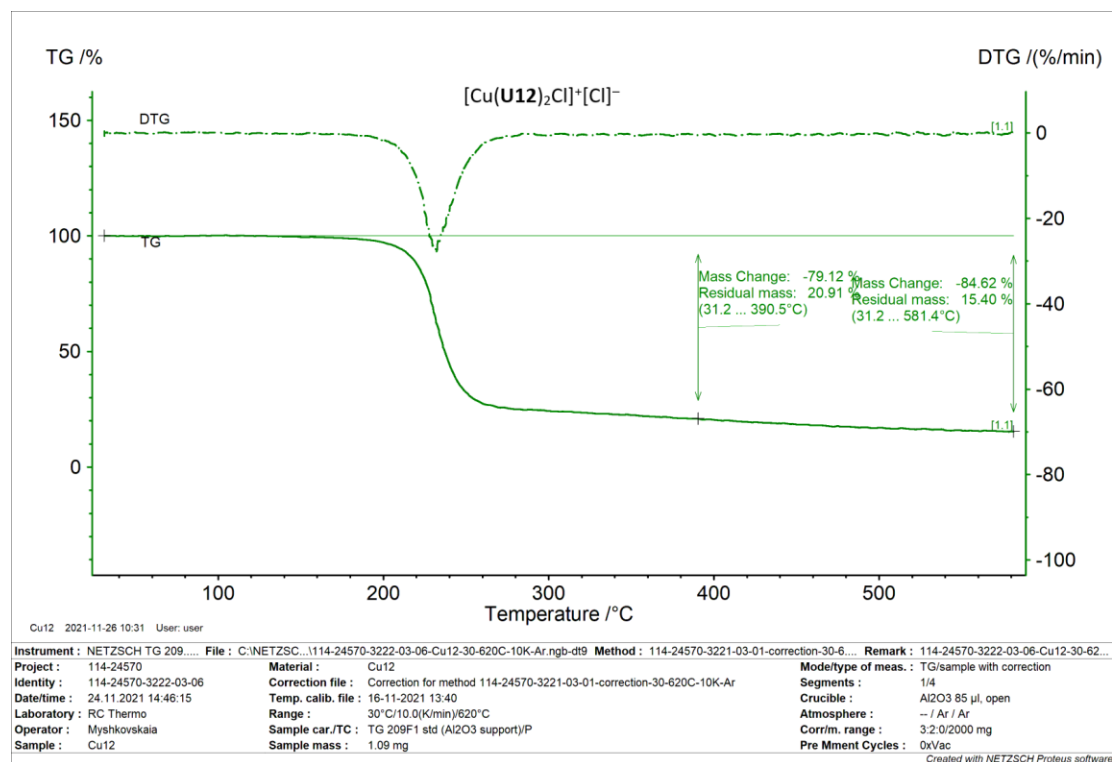

**Figure S20.** TG/DTG curves of [Cu(12)<sub>2</sub>Cl]<sup>+</sup>[Cl]<sup>-</sup>.

#### 4. References

- (1) Rassadin, V. A.; Zimin, D. P.; Raskil'dina, G. Z.; Ivanov, A. Y.; Boyarskiy, V. P.; Zlatskii, S. S.; Kukushkin, V. Y. Solvent- and Halide-Free Synthesis of Pyridine-2-Yl Substituted Ureas through Facile C–H Functionalization of Pyridine N-Oxides. *Green Chem.* **2016**, *18* (24), 6630–6636.
- (2) Geyl, K.; Baykov, S.; Tarasenko, M.; Zelenkov, L. E.; Matveevskaya, V.; Boyarskiy, V. P. Convenient Entry to N-Pyridinylureas with Pharmaceutically Privileged Oxadiazole Substituents via the Acid-Catalyzed C H Activation of N-Oxides. *Tetrahedron Lett.* **2019**, *60* (40), 151108.
- (3) Baykov, S.; Mikherdov, A.; Novikov, A.; Geyl, K.; Tarasenko, M.; Gureev, M.; Boyarskiy, V.  $\pi$ – $\pi$  Noncovalent Interaction Involving 1,2,4- and 1,3,4-Oxadiazole Systems: The Combined Experimental, Theoretical, and Database Study. *Molecules* **2021**, *26* (18), 5672.
- (4) Kasatkina, S. O.; Geyl, K. K.; Baykov, S. V.; Boyarskaya, I. A.; Boyarskiy, V. P. Catalyst-Free Synthesis of Substituted Pyridin-2-Yl, Quinolin-2-Yl, and Isoquinolin-1-Yl Carbamates from the Corresponding Hetaryl Ureas and Alcohols. *Org. Biomol. Chem.* **2021**, *19* (27), 6059–6065.
